# Supplementary material
Source: publisher site journal article supplement (https://www.dovepress.com/article/263646)
Supplement: Supplementary file 1 [file get_supplementary_file.php]

## Additional file 1

Table A provides a list of all relevant questions or symptoms extracted from the five papers.

| <b>QUESTIONS OR SYMPTOMS IDENTIFIED IN RELEVANT LITERATURE (41 ITEMS)</b> |                                                                                                              |
|---------------------------------------------------------------------------|--------------------------------------------------------------------------------------------------------------|
| <b>Konno et al.<sup>1</sup></b>                                           | Q1 Numbness and/or pain in the thighs down to the calves and shins.                                          |
|                                                                           | Q2 Numbness and/or pain increase in intensity after walking for a while but are relieved by taking a rest.   |
|                                                                           | Q3 Standing for a while brings on numbness and/or pain in the thighs down to the calves and shins.           |
|                                                                           | Q4 Numbness and/or pain are reduced by bending forwards.                                                     |
|                                                                           | Q5 Numbness is present in both legs.                                                                         |
|                                                                           | Q6 Numbness is present in the soles of both feet.                                                            |
|                                                                           | Q7 Numbness arises around the buttocks.                                                                      |
|                                                                           | Q8 Numbness is present but pain is absent.                                                                   |
|                                                                           | Q9 A burning sensation arises around the buttocks.                                                           |
|                                                                           | Q10 Walking nearly causes urination.                                                                         |
| <b>Aizawa et al.<sup>2</sup><br/>(only questions related to LSS)</b>      | Q11 Difficulty bending forward because of numbness and/or pain.                                              |
|                                                                           | Q12 Difficulty putting on socks because of numbness and/or pain.                                             |
|                                                                           | Q13 Numbness and/or pain increase in intensity after walking for a while but are relieved by taking a rest.  |
|                                                                           | Q14 Standing for a while brings numbness and/or pain in the thigh(s) down to the calf or calves and shin(s). |
|                                                                           | Q15 Numbness and/or pain are reduced by bending forward.                                                     |
|                                                                           | Q16 Numbness is present, but pain is absent.                                                                 |
|                                                                           | Q17 Numbness and/or pain is present in both legs.                                                            |
|                                                                           | Q18 Numbness is present in the soles of both feet.                                                           |
|                                                                           | Q19 Numbness arises around the buttocks.                                                                     |
|                                                                           | Q20 I am ≥ 60 years old.                                                                                     |
| <b>Tomkins-Lane et al.<sup>3</sup></b>                                    | Q21 Does the patient have leg or buttock pain while walking?                                                 |
|                                                                           | Q22 Does the patient flex forward to relieve symptoms?                                                       |
|                                                                           | Q23 Does the patient feel relief when using a shopping cart or bicycle?                                      |
|                                                                           | Q24 Does the patient have motor or sensory disturbance while walking?                                        |
|                                                                           | Q25 Are the pulses in the foot present and symmetric?                                                        |
|                                                                           | Q26 Does the patient have lower extremity weakness?                                                          |
|                                                                           | Q27 Does the patient have low back pain?                                                                     |
| <b>Sandella et al.<sup>4</sup></b>                                        | Q28 Leg pain while walking                                                                                   |
|                                                                           | Q29 Must sit down or bend forward to relieve pain                                                            |
|                                                                           | Q30 Flex forward while walking                                                                               |
|                                                                           | Q31 Normal pulses in foot                                                                                    |
|                                                                           | Q32 Low back pain                                                                                            |
|                                                                           | Q33 Lower extremity weakness                                                                                 |
|                                                                           | Q34 Relief with rest                                                                                         |
|                                                                           | Q35 Sensory deficits                                                                                         |

**Genevay et al.<sup>5</sup>**

- Q36 Age >60 years
- Q37 Positive 30-s extension test
- Q38 Patient reports pain in both legs
- Q39 Patient reports leg pain relieved by sitting
- Q40 Patient reports leg pain decreased by leaning forward or flexing the spine
- Q41 Negative SLR-60 test

Table B shows how the 41 questions and symptoms were merged into 13 questions.

|           | <b>CRUDE TRANSLATION</b>                                                | <b>QUESTION IN DANISH</b>                                                            | <b>ORIGINAL 41 QUESTIONS</b>                                    | <b>QUESTION NUMBER</b> | <b>REFERENCE</b>                 |
|-----------|-------------------------------------------------------------------------|--------------------------------------------------------------------------------------|-----------------------------------------------------------------|------------------------|----------------------------------|
| <b>Q1</b> | How old are you? ____years                                              | Hvor gammel er du? _____ år                                                          | I am ≥ 60 years old                                             | Q20                    | Aizawa et al. <sup>2</sup>       |
|           |                                                                         |                                                                                      | Age >60 years                                                   | Q36                    | Genevay et al. <sup>5</sup>      |
| <b>Q2</b> | Do you have low back pain?                                              | Har du smerter i lænden?                                                             | Does the patient have low back pain?                            | Q27                    | Tomkins-Lane et al. <sup>3</sup> |
|           |                                                                         |                                                                                      | Low back pain                                                   | Q32                    | Sandella et al. <sup>4</sup>     |
| <b>Q3</b> | Do you sometimes feel pain or numbness in one or both legs or buttocks? | Har du sommetider smerter eller føleforstyrrelser i ét eller begge ben eller balder? |                                                                 |                        |                                  |
| <b>Q4</b> | Do you feel pain or numbness in both legs or buttocks?                  | Har du smerter eller føleforstyrrelser i begge ben eller balder?                     | Numbness and/or pain in the thighs down to the calves and shins | Q1                     | Konno et al. <sup>1</sup>        |
|           |                                                                         |                                                                                      | Numbness is present in both legs                                | Q5                     | Konno et al. <sup>1</sup>        |
|           |                                                                         |                                                                                      | Numbness arises around the buttocks                             | Q7                     | Konno et al. <sup>1</sup>        |
|           |                                                                         |                                                                                      | Numbness and/or pain is present in both legs                    | Q17                    | Aizawa et al. <sup>2</sup>       |
|           |                                                                         |                                                                                      | Numbness arises around the buttocks                             | Q19                    | Aizawa et al. <sup>2</sup>       |
|           |                                                                         |                                                                                      | Patient reports pain in both legs                               | Q38                    | Genevay et al. <sup>5</sup>      |
|           |                                                                         |                                                                                      |                                                                 |                        |                                  |
| <b>Q5</b> | Do you feel numbness in the soles of both feet?                         | Har du føleforstyrrelser under begge fødder?                                         | Numbness is present in the soles of both feet                   | Q6                     | Konno et al. <sup>1</sup>        |
|           |                                                                         |                                                                                      | Numbness is present in the soles of both feet                   | Q18                    | Aizawa et al. <sup>2</sup>       |
| <b>Q6</b> | Does your pain or numbness in                                           | Forværres dine smerter eller                                                         |                                                                 |                        |                                  |

|           |                                                                                            |                                                                                                                |                                                                                                          |     |                                  |
|-----------|--------------------------------------------------------------------------------------------|----------------------------------------------------------------------------------------------------------------|----------------------------------------------------------------------------------------------------------|-----|----------------------------------|
|           | one or both legs increase while walking?                                                   | føleforstyrrelser i ét eller begge ben eller balder når du går?                                                | Does the patient have leg or buttock pain while walking?                                                 | Q21 | Tomkins-Lane et al. <sup>3</sup> |
|           |                                                                                            |                                                                                                                | Leg pain while walking                                                                                   | Q28 | Sandella et al. <sup>4</sup>     |
| <b>Q7</b> | Does your pain or numbness in one or both legs increase when standing for a while?         | Forværres dine smerter eller føleforstyrrelser i ét eller begge ben eller balder når du har stået i noget tid? | Standing for a while brings on numbness and/or pain in the thighs down to the calves and shins           | Q3  | Konno et al. <sup>1</sup>        |
|           |                                                                                            |                                                                                                                | Standing for a while brings numbness and/or pain in the thigh(s) down to the calf or calves and shin(s). | Q14 | Aizawa et al. <sup>2</sup>       |
| <b>Q8</b> | Does your pain or numbness in one or both legs or buttocks decrease when bending forwards? | Lindres dine smerter eller føleforstyrrelser i ét eller begge ben eller balder når du bøjer dig fremover?      | Numbness and/or pain are reduced by bending forwards.                                                    | Q4  | Konno et al. <sup>1</sup>        |
|           |                                                                                            |                                                                                                                | Numbness and/or pain are reduced by bending forward.                                                     | Q15 | Aizawa et al. <sup>2</sup>       |
|           |                                                                                            |                                                                                                                | Does the patient flex forward to relieve symptoms?                                                       | Q22 | Tomkins-Lane et al. <sup>3</sup> |
|           |                                                                                            |                                                                                                                | Must sit down or <b>bend forward</b> to relieve pain                                                     | Q29 | Sandella et al. <sup>4</sup>     |
|           |                                                                                            |                                                                                                                | Patient reports leg pain decreased by leaning forward or flexing the spine                               | Q40 | Genevay et al. <sup>5</sup>      |

|     |                                                                                                 |                                                                                                             |                                                                     |     |                                  |
|-----|-------------------------------------------------------------------------------------------------|-------------------------------------------------------------------------------------------------------------|---------------------------------------------------------------------|-----|----------------------------------|
| Q9  | Does your pain or numbness in one or both legs or buttocks decrease by sitting?                 | Lindres dine smerter eller føleforstyrrelser i ét eller begge ben eller balder når du sidder?               | Must <b>sit down</b> or bend forward to relieve pain                | Q29 | Sandella et al. <sup>4</sup>     |
|     |                                                                                                 |                                                                                                             | Patient reports leg pain relieved by sitting                        | Q39 | Genevay et al. <sup>5</sup>      |
| Q10 | Does your pain or numbness in one or both legs or buttocks decrease when biking?                | Lindres dine smerter eller føleforstyrrelser i ét eller begge ben eller balder når du cykler?               |                                                                     |     |                                  |
| Q11 | Does your pain or numbness in one or both legs or buttocks decrease when using a shopping cart? | Lindres dine smerter eller føleforstyrrelser i ét eller begge ben, når du læner dig ind over indkøbsvognen? | Does the patient feel relief when using a shopping cart or bicycle? | Q23 | Tomkins-Lane et al. <sup>3</sup> |
| Q12 | Do you flex forward while walking?                                                              | Bøjer du dig forover, mens du går?                                                                          | Flex forward while walking                                          | Q30 | Sandella et al. <sup>4</sup>     |
| Q13 | Do you feel weakness in the legs while walking?                                                 | Får du "tunge ben" når du går?                                                                              | Does the patient have motor or sensory disturbance while walking?   | Q24 | Tomkins-Lane et al. <sup>3</sup> |
|     |                                                                                                 |                                                                                                             | Does the patient have lower extremity weakness?                     | Q26 | Tomkins-Lane et al. <sup>3</sup> |
|     |                                                                                                 |                                                                                                             | Lower extremity weakness                                            | Q33 | Sandella et al. <sup>4</sup>     |
|     |                                                                                                 | <b>NOT INCLUDED</b><br><i>Q1+Q2 (risk of local dependence)</i>                                              | Numbness and/or pain increase in intensity                          | Q2  | Konno et al. <sup>1</sup>        |

|                                                 |                                                                                                         |        |                                                         |
|-------------------------------------------------|---------------------------------------------------------------------------------------------------------|--------|---------------------------------------------------------|
|                                                 | after walking for a while but are relieved by taking a rest                                             |        |                                                         |
| <b>Q1+Q2 (risk of local dependence)</b>         | Numbness and/or pain increase in intensity after walking for a while but are relieved by taking a rest. | Q13    | Aizawa et al. <sup>2</sup>                              |
| Question related to cauda equina symptoms       | A burning sensation arises around the buttocks.                                                         | Q9     | Konno et al. <sup>1</sup>                               |
| Question related to cauda equina symptoms       | Walking nearly causes urination.                                                                        | Q10    | Konno et al. <sup>1</sup>                               |
| Question related to symptoms on disc herniation | Difficulty bending forward because of numbness and/or pain.                                             | Q11    | Aizawa et al. <sup>2</sup>                              |
| Not clear how it differentiates                 | Numbness is present, but pain is absent.                                                                | Q8 Q16 | Konno et al. <sup>1</sup><br>Aizawa et al. <sup>2</sup> |
| Rest not clear (sit, lie, stand etc.)           | Relief with rest                                                                                        | Q34    | Sandella et al. <sup>4</sup>                            |
| Question related to symptoms on disc herniation | Difficulty putting on socks because of numbness and/or pain.                                            | Q12    | Aizawa et al. <sup>2</sup>                              |
| Related to physical examination                 | Are the pulses in the foot present and symmetric?                                                       | Q25    | Tomkins-Lane et al. <sup>3</sup>                        |
| Related to physical examination                 | Normal pulses in foot                                                                                   | Q31    | Sandella et al. <sup>4</sup>                            |
| Related to physical examination                 | Positive 30-s extension test                                                                            | Q37    | Genevay et al. <sup>5</sup>                             |
| Related to physical examination                 | Negative SLR-60 test                                                                                    | Q41    | Genevay et al. <sup>5</sup>                             |
| Related to physical examination                 | Sensory deficits                                                                                        | Q35    | Sandella et al. <sup>4</sup>                            |

## Reference List

1. Konno S, Kikuchi S, Tanaka Y, et al. A diagnostic support tool for lumbar spinal stenosis: a self-administered, self-reported history questionnaire. *BMC Musculoskelet Disord.* 2007;8:102.
2. Aizawa T, Tanaka Y, Yokoyama T, et al. New diagnostic support tool for patients with leg symptoms caused by lumbar spinal stenosis and lumbar intervertebral disc herniation: A self-administered, self-reported history questionnaire. *J Orthop Sci.* 2016;21(5):579-585.
3. Tomkins-Lane C, Melloh M, Lurie J, et al. Consensus on the Clinical Diagnosis of Lumbar Spinal Stenosis: Results of an International Delphi Study. *Spine (Phila Pa 1976).* 2016.
4. Sandella DE, Haig AJ, Tomkins-Lane C, Yamakawa KS. Defining the clinical syndrome of lumbar spinal stenosis: a recursive specialist survey process. *PM R.* 2013;5(6):491-495; quiz 495.
5. Genevay S, Courvoisier DS, Konstantinou K, et al. Clinical classification criteria for neurogenic claudication caused by lumbar spinal stenosis. The N-CLASS criteria. *Spine J.* 2018;18(6):941-947.
